# Supplementary material for: CropSuite – A comprehensive open-source crop suitability model considering climate variability for climate impact assessment
Source: Copernicus journal article supplement (doi:10.5194/egusphere-2024-2526), 2024-09-20
Supplement: Supplementary file 1 [file egusphere-2024-2526-supplement.pdf]

1

# Supplement

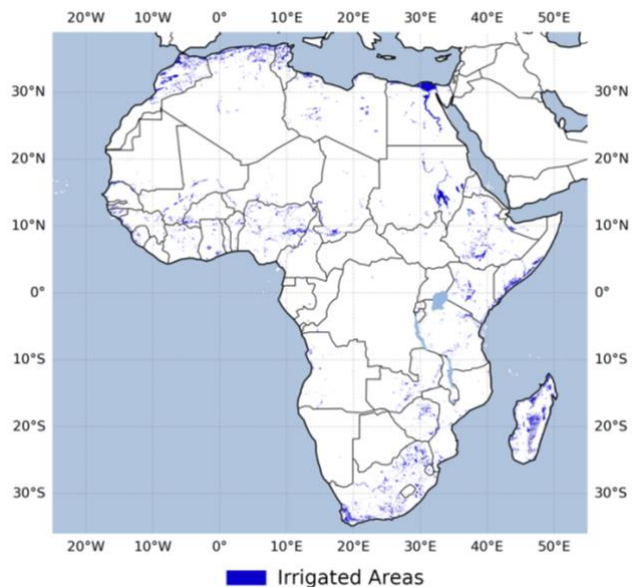

2

3 **Figure S1: Irrigated areas for Africa according to Meier et al. (2018).**

4

a) First Optimal Sowing Date Multiple Cropping Maize

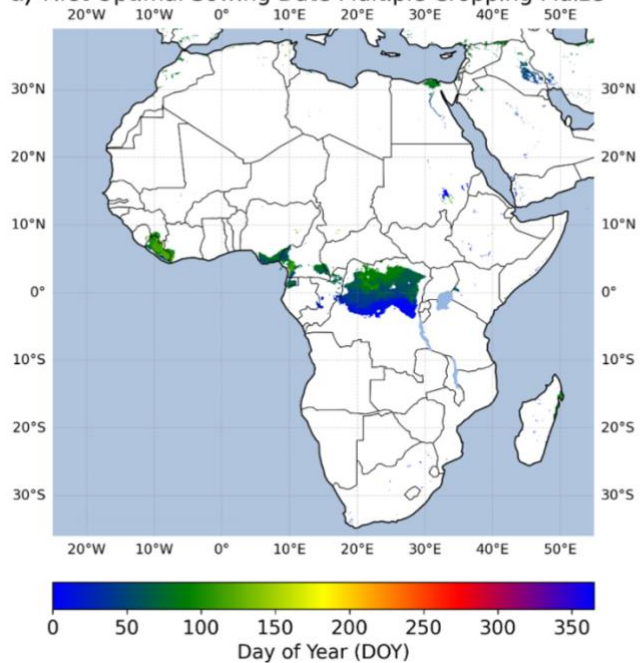

5

b) Second Optimal Sowing Date Multiple Cropping Maize

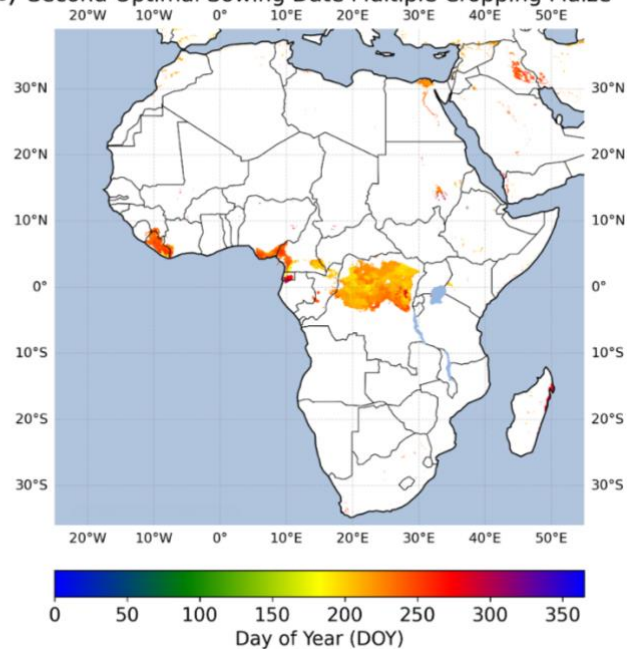

6 **Figure S2: (a) First- and (b) second optimal sowing date under consideration of multiple cropping without soil and terrain**  
7 **limitations for maize.**

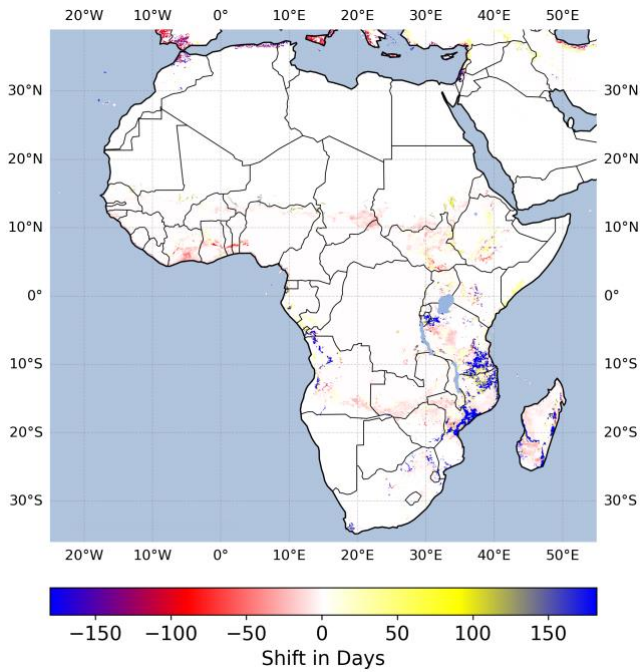

8

9  
10

**Figure S3: Impact of the consideration of climate variability on the optimal sowing date for maize under historical climate conditions from 1991 to 2010.** Irrigated areas are considered according to Meier et al. (2018).

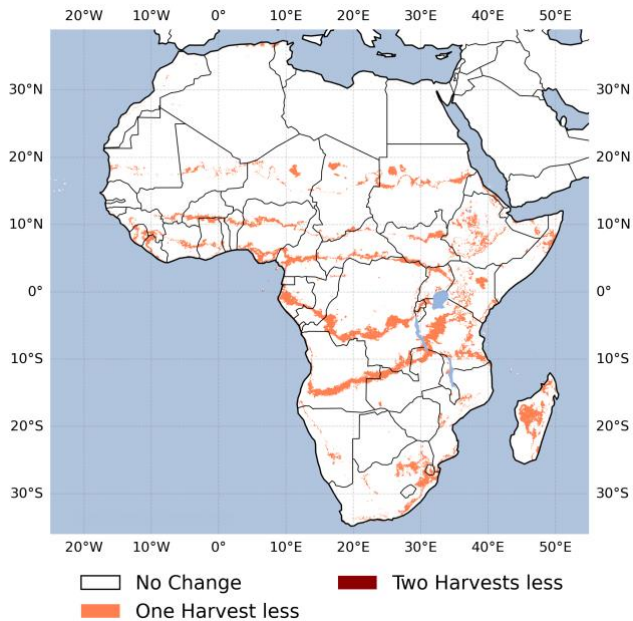

11

12  
13

**Figure S4: Impact of the consideration of climate variability on the multiple cropping potential for maize under historical climate conditions from 1991 to 2010.** Irrigated areas are considered according to Meier et al. (2018).

14

**Literature**

15

Meier, J., Zabel, F., and Mauser, W.: A global approach to estimate irrigated areas – a comparison between different data and statistics, *Hydrology and Earth System Sciences*, 22, 1119–1133-1119–1133, 2018.

16  
17
